# Supplementary material for: Improving solubility and storage stability of rifaximin via solid-state solvation with Transcutol®
Source: Royal Society of Chemistry journal article supplement (doi:10.1039/c9ce00567f), 2019-01-01
Supplement: c9ce00567f1.pdf [file c9ce00567f1.pdf]

## Electronic Supplementary Information

### Improving solubility and storage stability of Rifaximin via solid-state solvation with Transcutol®

F. Grepioni,<sup>a,\*</sup> D. Braga,<sup>a</sup> L. Chelazzi,<sup>a</sup> O. Shemchuk,<sup>a</sup> P. Maffei,<sup>b</sup> A. Sforzini,<sup>b</sup> G. C. Viscomi,<sup>b,\*</sup>

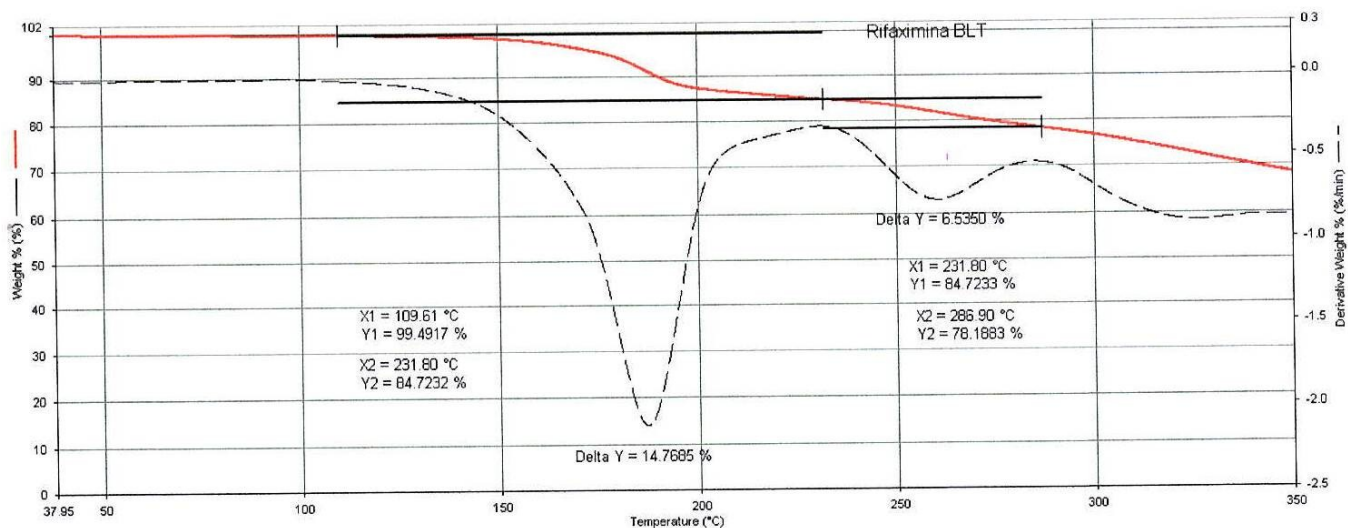

**Figure ESI-1.** TGA trace for rifaximin  $\tau$ , showing that decomposition starts at ca. 130-140°C and accompanies the melting process. No loss of solvent is observed at low temperature.

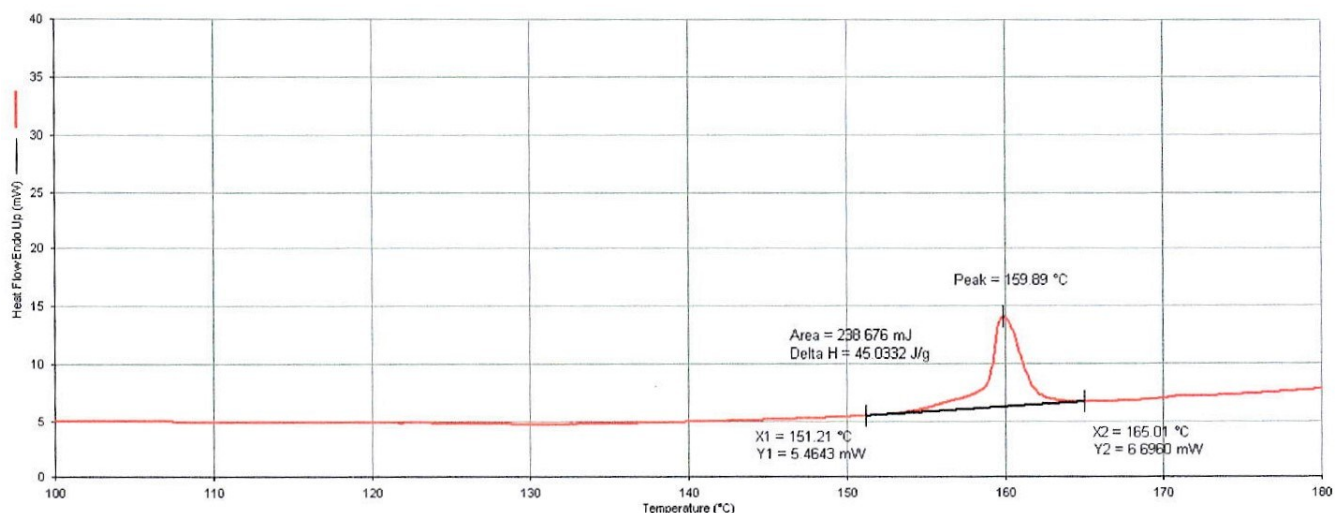

**Figure ESI-2.** DSC trace for rifaximin  $\tau$ , showing the melting of the solvate form at 160°C (peak temperature).
